# Supplementary material for: Prolactin-related adverse events and change in prolactin levels in pediatric patients given antipsychotics for schizophrenia and schizophrenia spectrum disorders: A systematic review
Source: PubMed Central journal article supplement (PMC5101725; doi:10.1186/s12887-016-0710-y), 2016-11-09
Supplement: 12887_2016_710_MOESM1_ESM.pdf [file 12887_2016_710_MOESM1_ESM.pdf]

|                           | Random sequence generation (selection bias) | Allocation concealment (selection bias) | Blinding of participants and personnel (performance bias) | Blinding of outcome assessment (detection bias) | Incomplete outcome data (attrition bias) | Selective reporting (reporting bias) | Other bias |
|---------------------------|---------------------------------------------|-----------------------------------------|-----------------------------------------------------------|-------------------------------------------------|------------------------------------------|--------------------------------------|------------|
| Findling et al 2008       | ?                                           | ?                                       | +                                                         | ?                                               | -                                        | +                                    | -          |
| Findling et al 2012       | ?                                           | +                                       | +                                                         | ?                                               | +                                        | +                                    | ?          |
| Haas et al 2009a          | ?                                           | ?                                       | +                                                         | ?                                               | +                                        | +                                    | -          |
| Haas et al 2009b          | +                                           | ?                                       | +                                                         | ?                                               | +                                        | +                                    | ?          |
| Kryzhanovskaya et al 2009 | +                                           | ?                                       | +                                                         | ?                                               | +                                        | +                                    | -          |
| Singh et al 2011          | +                                           | +                                       | +                                                         | ?                                               | +                                        | +                                    | ?          |
